# Supplementary material
Source: PubMed Central journal article supplement (PMC4136069)
Supplement: AAC.02683-14_zac008143168so1.pdf [file AAC.02683-14_zac008143168so1.pdf]

**AAC02683-14****Supplemental Table S1.** Antimicrobial susceptibility profiles of DNSE and daptomycin-susceptible *E. faecium* (DSE) clinical isolates

| Antimicrobial agent                    | DNSE isolates<br>(n = 42, % <sup>a</sup> ) | DSE isolates<br>(n = 43, % <sup>a</sup> ) | <i>p</i> value |
|----------------------------------------|--------------------------------------------|-------------------------------------------|----------------|
| Daptomycin <sup>b</sup>                | 0                                          | 43 (100)                                  | <0.0001        |
| Vancomycin                             | 5 (11.9)                                   | 1 (2.3)                                   | 0.1096         |
| Ampicillin                             | 0                                          | 0                                         | -              |
| Linezolid                              | 40 (95.2)                                  | 41 (95.3)                                 | 1.0000         |
| Nitrofurantoin                         | 23 (54.7)                                  | 24 (55.8)                                 | 1.0000         |
| Rifampin                               | 3 (7.1)                                    | 4 (9.3)                                   | 1.0000         |
| Quinupristin/dalfopristin              | 40 (95.2)                                  | 42 (97.7)                                 | 0.6160         |
| Tetracycline                           | 1 (2.4)                                    | 6 (13.9)                                  | 0.1096         |
| Levofloxacin                           | 1 (2.4)                                    | 0                                         | -              |
| Erythromycin                           | 0                                          | 0                                         | -              |
| Gentamicin synergy screen <sup>c</sup> | 37 (88.1)                                  | 37 (86.1)                                 | 1.0000         |

<sup>a</sup> The data shown in the parenthesis are % susceptible.

<sup>b</sup> Refer to Table 1 for the MICs of DNSE isolates. The MIC distributions for the 43 DSE isolates are: 1 µg/mL (n = 1), 2 µg/mL (n = 8), 3 µg/mL (n = 6), 4 µg/mL (n = 28).

<sup>c</sup> High level of aminoglycoside resistance if gentamicin MIC > 500 µg/mL).

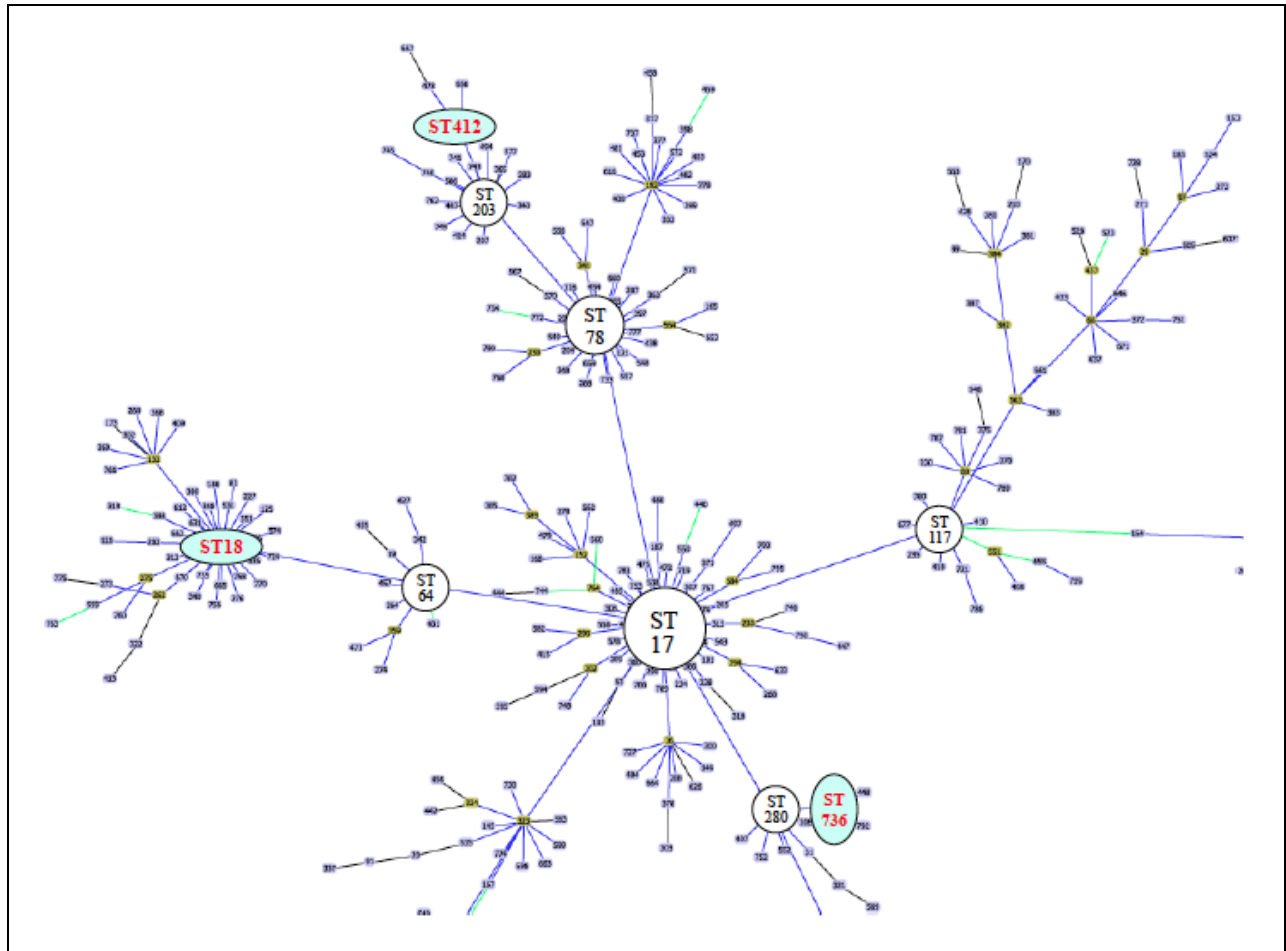

**Supplemental Figure 1.** Genetic relatedness of daptomycin-nonsusceptible *E. faecium* clinical isolates with vancomycin-resistant enterococci of the cluster complex 17 (CC17). The three major clones (ST18, ST412 and ST736) detected in this study are shown in red.
